# Supplementary material for: Synthesis of graphene layers on polycrystalline Ni foil using liquid ethanol
Source: Royal Society of Chemistry journal article supplement (doi:10.1039/d5ra06724c), 2025-01-01
Supplement: d5ra06724c1.pdf [file d5ra06724c1.pdf]

**Supplementary Material for Manuscript:**

**“Synthesis of Graphene Layers on Polycrystalline Ni Foil Using Liquid Ethanol”**

J. Zhou,<sup>1</sup> Y. Guo,<sup>2</sup> Elena Voloshina,<sup>3</sup> and Yuriy Dedkov<sup>4</sup>

<sup>1</sup>*Department of Physics, Shanghai University, 99 Shangda Road, 200444 Shanghai, P. R. China*

<sup>2</sup>*School of Physics and Advanced Energy, Henan University of Technology, Zhengzhou, 450000, Henan, P. R. China*

<sup>3</sup>*Division of Theoretical Physics, Ruđer Bošković Institute, Bijenička cesta 54, 10000 Zagreb, Croatia*

<sup>4</sup>*Center for Advanced Laser Techniques, Institute of Physics, Bijenička cesta 46, 10000 Zagreb, Croatia*

(\*Electronic mail: ydedkov@ifs.hr)

(\*Electronic mail: elena.voloshina@irb.hr)

(Dated: 25 October 2025)

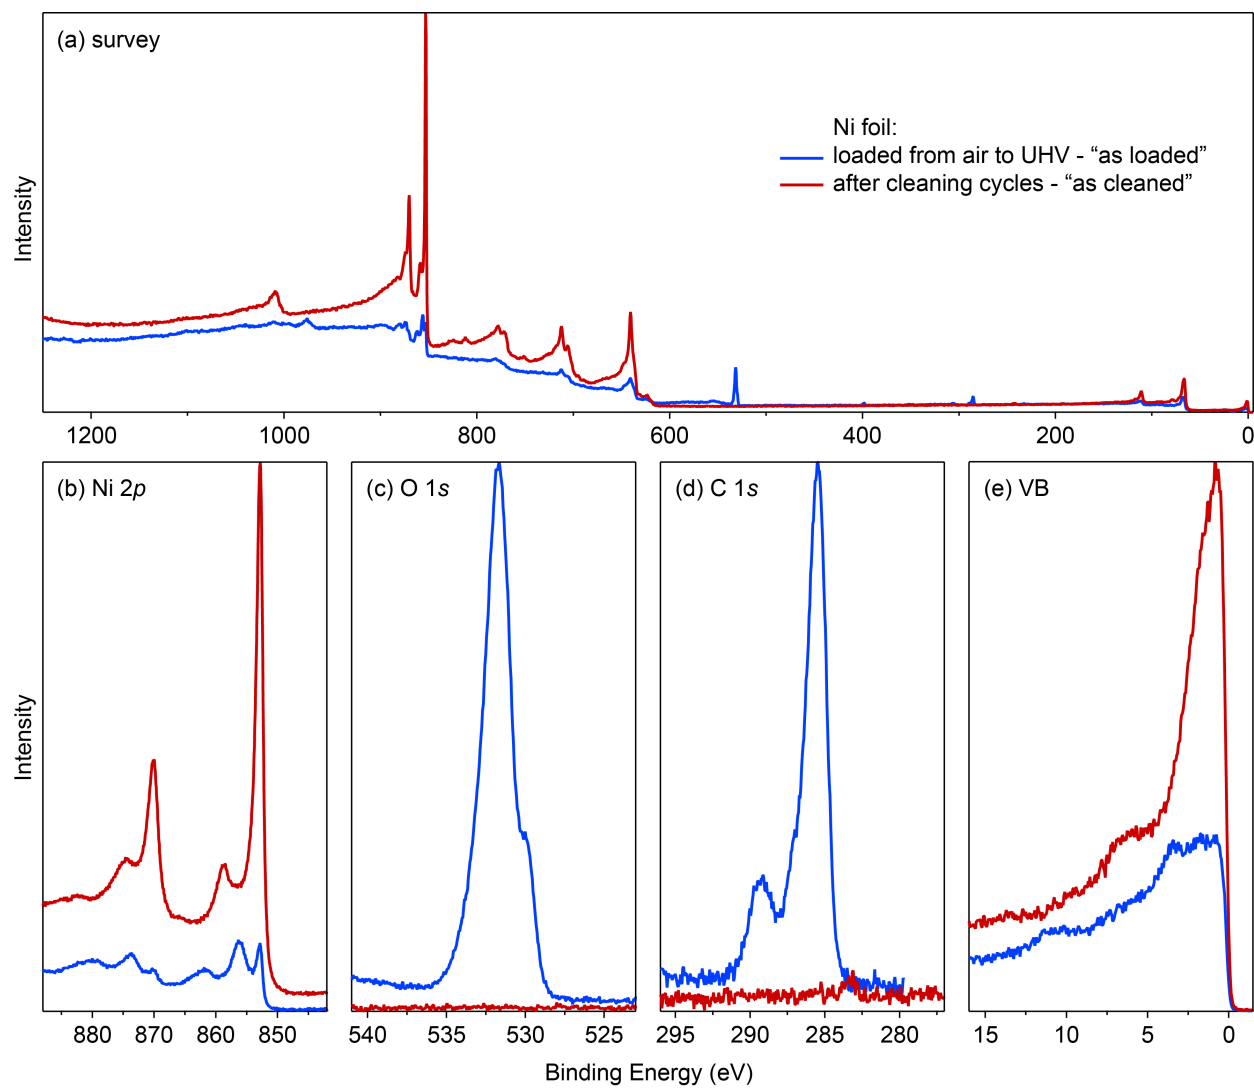

FIG. S1. XPS spectra of the “as loaded” and “as cleaned in UHV” Ni polycrystalline foil: (a) survey, (b) Ni 2*p*, (c) O 1*s*, (d) C 1*s*, and (e) valence band. Photon energy is  $h\nu = 1486.6$  eV.
